# Supplementary material for: Temporal Phylodynamics of Coxsackievirus A6 VP1 in Shenzhen（2022-2024）
Source: Research Square preprint supplement (doi:10.21203/rs.3.rs-6951771/v1), 2025-08-07
Supplement: Supplementary file 1 [file 4e333f19d15aa3551b830c37.xlsx]

## Sheet: Sheet1
NCBI accession number
AF081297
JQ364886
JQ364887
LC421598
LC421599
LC421601
LC421656
KP143073
KP143074
LC421626
KP143078
KP143079
KP143080
KP143081
LC421629
JN203517
JQ364888
KC866900
KM079503
KC866903
KC866921
KM079505
KM079513
LC421631
LC421633
LC421634
LC421638
HE572901
HE572908
HE572939
JQ364889
KY913428
KY913430
KJ577273
KJ577276
JX154921
JX154956
KJ865422
KJ865427
KM079515
KM079539
MF596065
LC438003
LC438020
LC438022
LC438023
LC224138
LC224141
LC224142
LC421640
KY211723
KY211724
JX495139
JX495149
JX495119
JX495120
JX495132
KY913432
KY913433
KJ577282
KJ577299
KU708571
MH018477
JX473334
JX473409
KJ865434
KM079548
KM079578
KY211690
KJ743209
KJ743212
MF596067
MF596069
LC438035
LC438038
LC438041
LC438045
OM885885
OM885898
OM885942
KY424425
KC207854
KC207855
KC207856
KC414741
KC414744
KC414755
KJ541438
KJ541439
KY913454
KY913459
MH544966
MH544982
MH544985
MH544987
KJ156351
KJ784508
KY211711
MH018465
MH018475
KC866945
KC866954
KF836585
KF836590
KJ865442
KM079579
KJ743237
LC438065
LC438081
LC438085
MG252896
OM885917
OM885947
LC224147
LC364128
LC421644
KU366284
KU366285
KU366286
KU366287
KY424412
KY424358
KY211736
KY211737
KY424404
KJ848322
KY424424
LC813363
KY211726
KY211727
KF647878
KJ541375
KJ541376
KT985037
KY211691
KY211701
KF836765
KF836766
KF836767
KY424388
KY424394
KY424408
MN336278
MN336295
KY424390
KY424420
KY424389
KY424418
KY913466
OL688672
MF962669
MF962682
KJ577315
KJ577406
KY424393
KY424410
KY424419
KY211706
KY211708
KY424405
MH018481
MH018485
KF836561
KF836601
KP005918
MF596072
MF596077
MF596087
LC438087
LC438096
LC438100
MG252903
MG252912
MG252915
OM885902
OM885913
OM885958
OM885969
KU958490
KU958492
MN514818
KY211740
LC412058
KU212261
KU212278
KY424381
KY424382
MN336300
MN336307
KY424385
KY913478
KY913483
KY913485
KY424386
KU708589
KU708591
MH018476
MH018492
KY211692
KY211713
MF596106
LC438107
LC438130
LC438131
MK252971
MK252972
OM885904
OM885965
LC224158
LC421646
LC421647
MN514807
KY211720
KY211735
MW178555
MW178558
LC813365
KU736932
KU736942
KX871238
KY211718
KY211721
KY211741
KY424356
MN329127
MN329146
MG488223
MG488226
MG488229
KY424364
KY424371
KY913495
OL677507
OL688692
KY424369
KU708594
KU708619
KY211694
KY211699
MH018486
MH018495
MH018498
KU844070
KU844085
MH716171
KY211709
KY211712
KY424372
MG488208
MF596115
MF596131
KX575865
LC438137
LC438139
MK252973
MK252980
MK252981
OM885953
OM885960
OM885961
LC364165
LC412935
LC412945
MK106256
MK106257
MW178566
MW178607
MW178608
LC813368
KX871245
KY972303
KY972304
KY972306
KY972308
MN336309
MN336311
OL688697
OL688699
MW075636
MH018483
MF596134
MF596135
MF596136
MF596137
MF596138
MF596139
MF596140
MF596143
MF596148
LC438141
LC438144
LC438145
LC438147
MK167096
MK167105
MK167121
MK252986
MK253001
OP947966
OM885899
OM885957
OM885959
LC364188
LC421653
LC421655
MN514804
MN514822
LC413122
MW178575
MW178603
MN233776
MN233836
MN336312
MN336331
OL688715
MW075639
MW075640
MH018484
MH018515
MH018520
MH018523
MH018538
MK839019
MK839020
MK839025
MK839033
MG385748
OL840773
MZ576354
MZ576380
MZ576381
MK167123
MK252992
OP947970
OP947976
MH796399
MT577700
MT577703
MT577717
MT577723
MT569400
MT569405
LC481391
LC481433
LC516745
MW178623
MW178682
MW178683
LC813371
MN233704
MN233830
MK357077
MK357078
MK357080
MK357084
MN341007
OL688730
OL688732
OL688735
OL688736
OL688743
OL677508
OR507400
OR507443
MT119386
MT119393
MT119395
MT119396
MT119397
MZ516415
OL840743
OQ031475
OQ031481
OQ031482
OP947978
OP947980
OP947987
PQ740728
LC555960
LC555987
LC603106
MW178721
LC813378
LC813380
OQ197406
OQ197419
OL688749
OL688754
PQ082976
OL677509
OR507401
OR507416
OR507450
OL470905
OL470906
OL840676
OL840677
OP948004
OP948005
OP948006
PQ740750
PQ740754
PQ740778
LC626201
LC626207
LC656496
LC712982
LC813393
LC813394
LC813395
OQ197421
PQ082983
PQ083007
OR507466
OR507473
OL470913
PQ611407
PQ611412
PQ754488
PQ740803
LC685214
LC712988
LC712991
LC712992
LC813398
LC813402
OQ197429
OQ197436
PQ082993
PQ082997
PQ083006
OR507497
OR507504
OR507538
PQ611419
PQ754489
PQ754508
PQ754509
PQ740821
PQ740849
LC791280
LC791344
LC791350
LC813406
LC813407
LC813408
LC813411
PQ083000
PQ083001
PQ083002
PQ083011
OR507544
OR507561
PQ754487
PQ740860
PQ740884
LC831095
LC831103
LC831104
LC813415
LC813427
LC813428
OR259264
OR259386
OR259387
